# Supplementary material for: Switching From a Protease Inhibitor–based Regimen to a Dolutegravir-based Regimen: A Randomized Clinical Trial to Determine the Effect on Peripheral Blood and Ileum Biopsies From Antiretroviral Therapy–suppressed Human Immunodeficiency Virus–infected Individuals
Source: PubMed Central journal article supplement — Clin Infect Dis. 2018 Dec 24;69(8):1320–8. doi: 10.1093/cid/ciy1095 (PMC6763634; doi:10.1093/cid/ciy1095), 2018-12-24

# Supplementary Figure 1

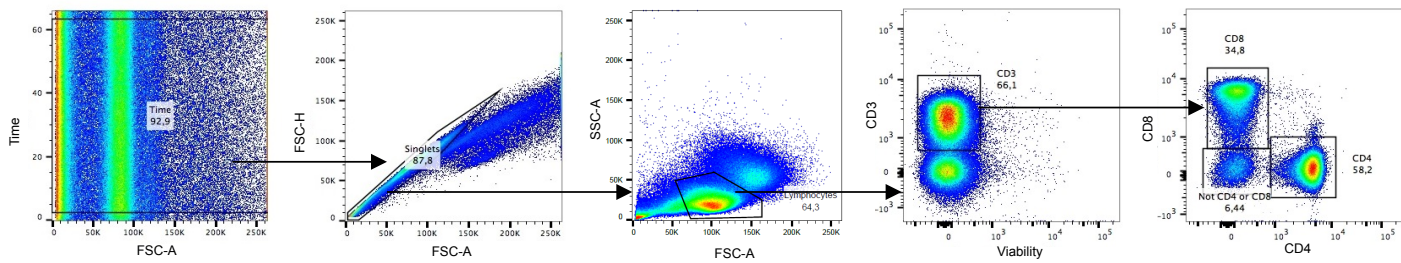

## CD4 gate

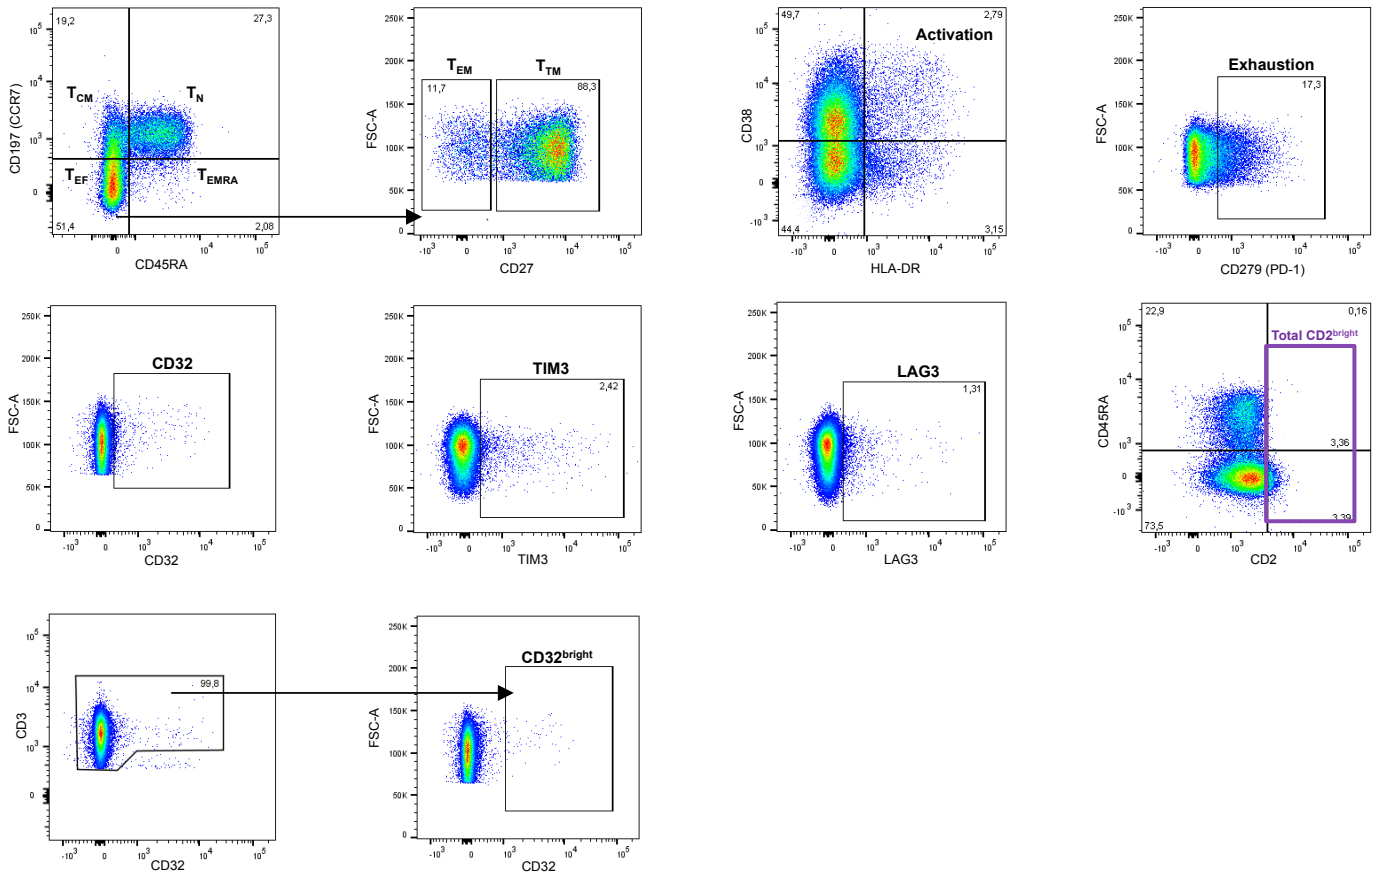

## CD8 gate

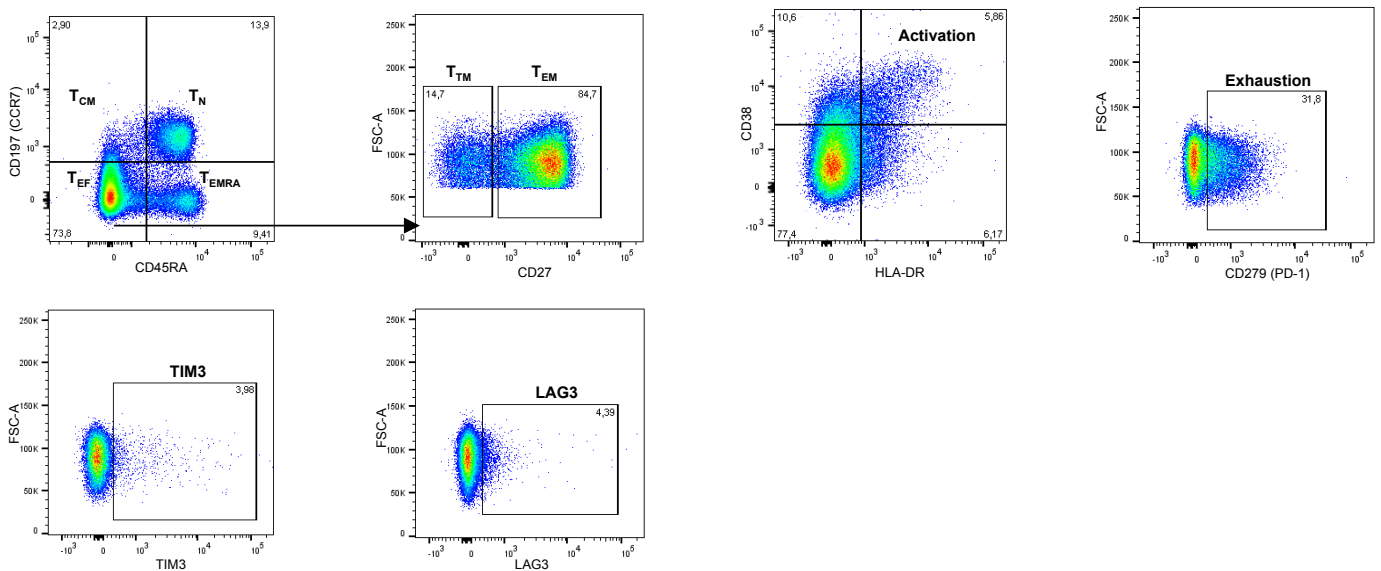

Supplementary Figure 2

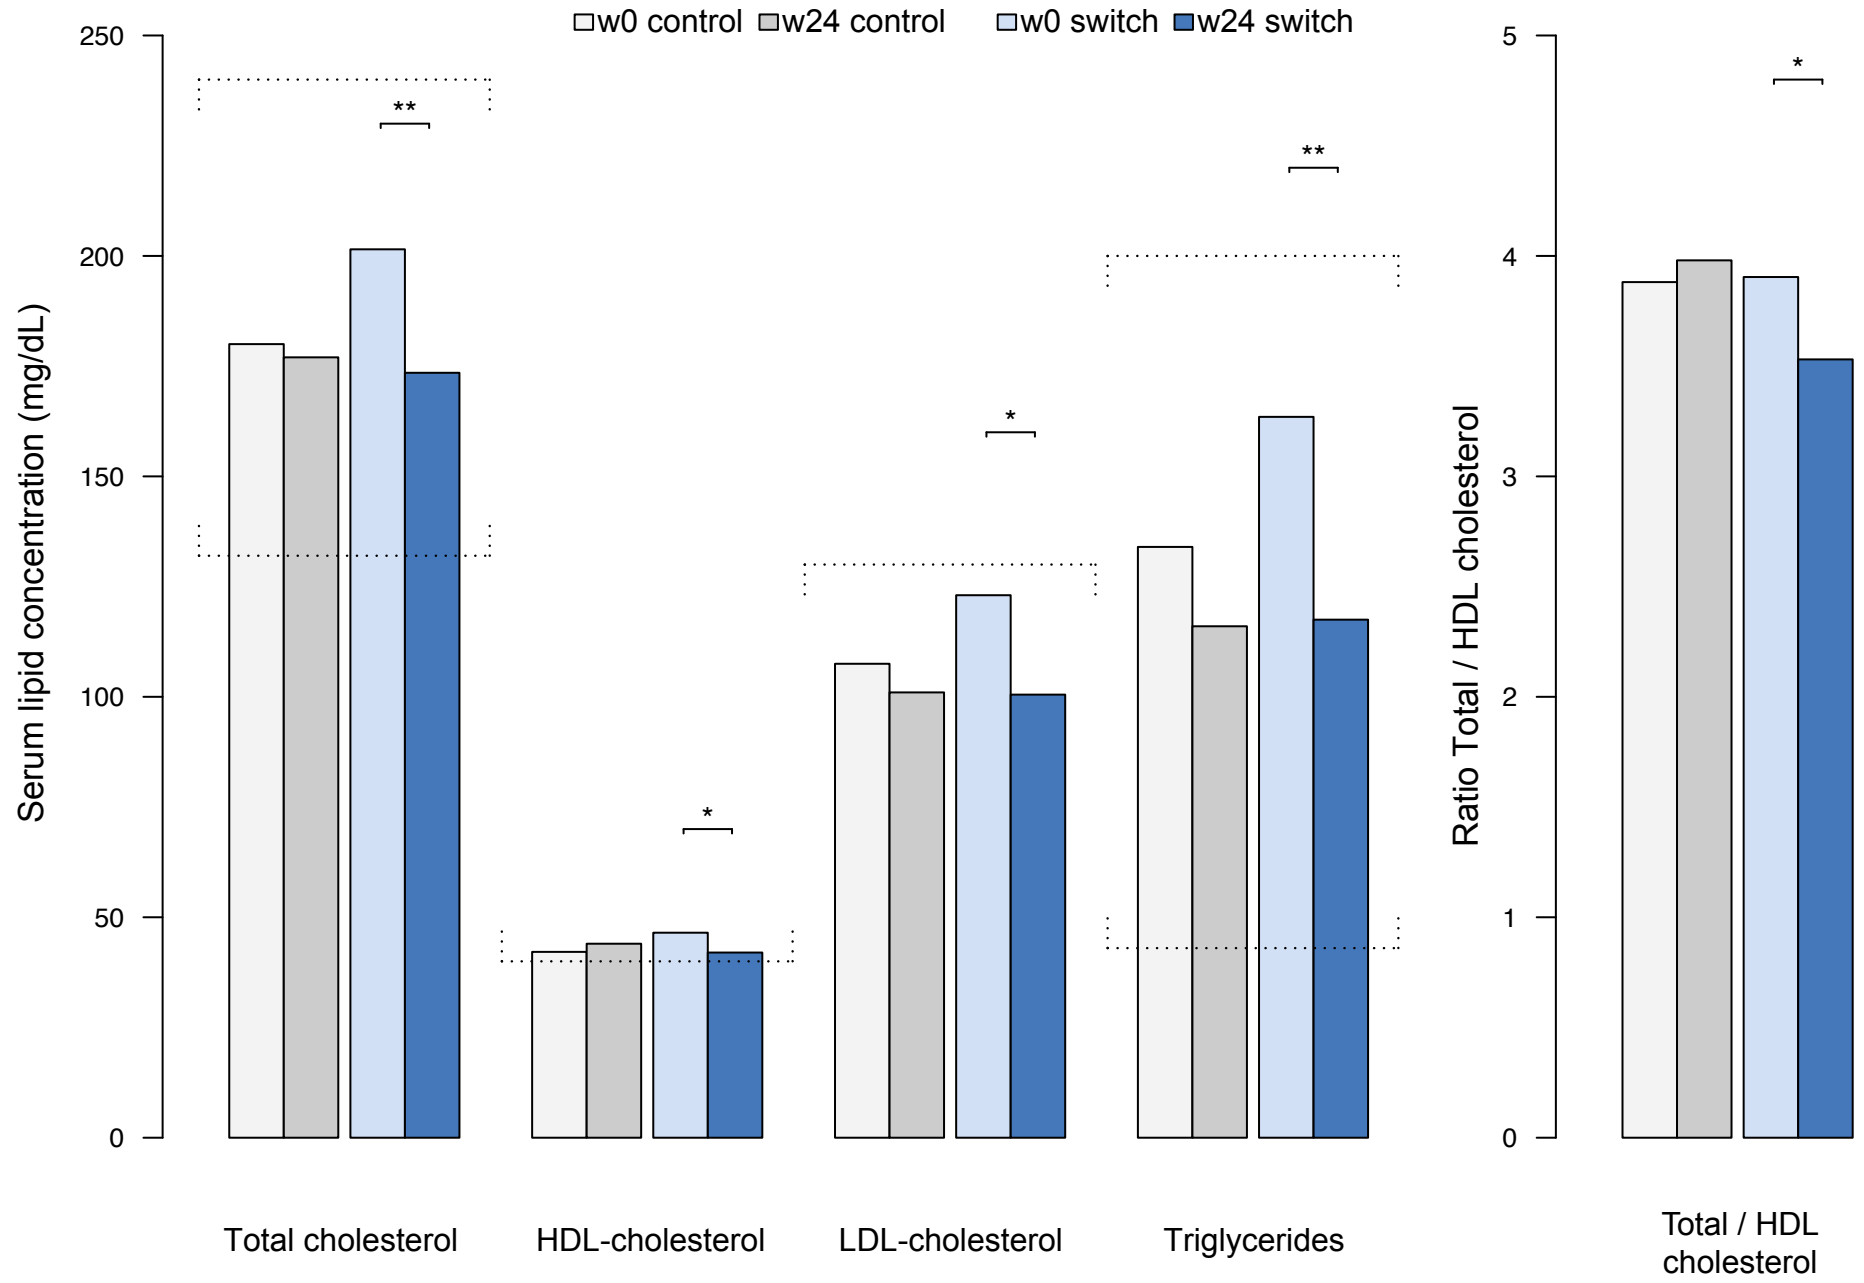

Supplementary Figure 3

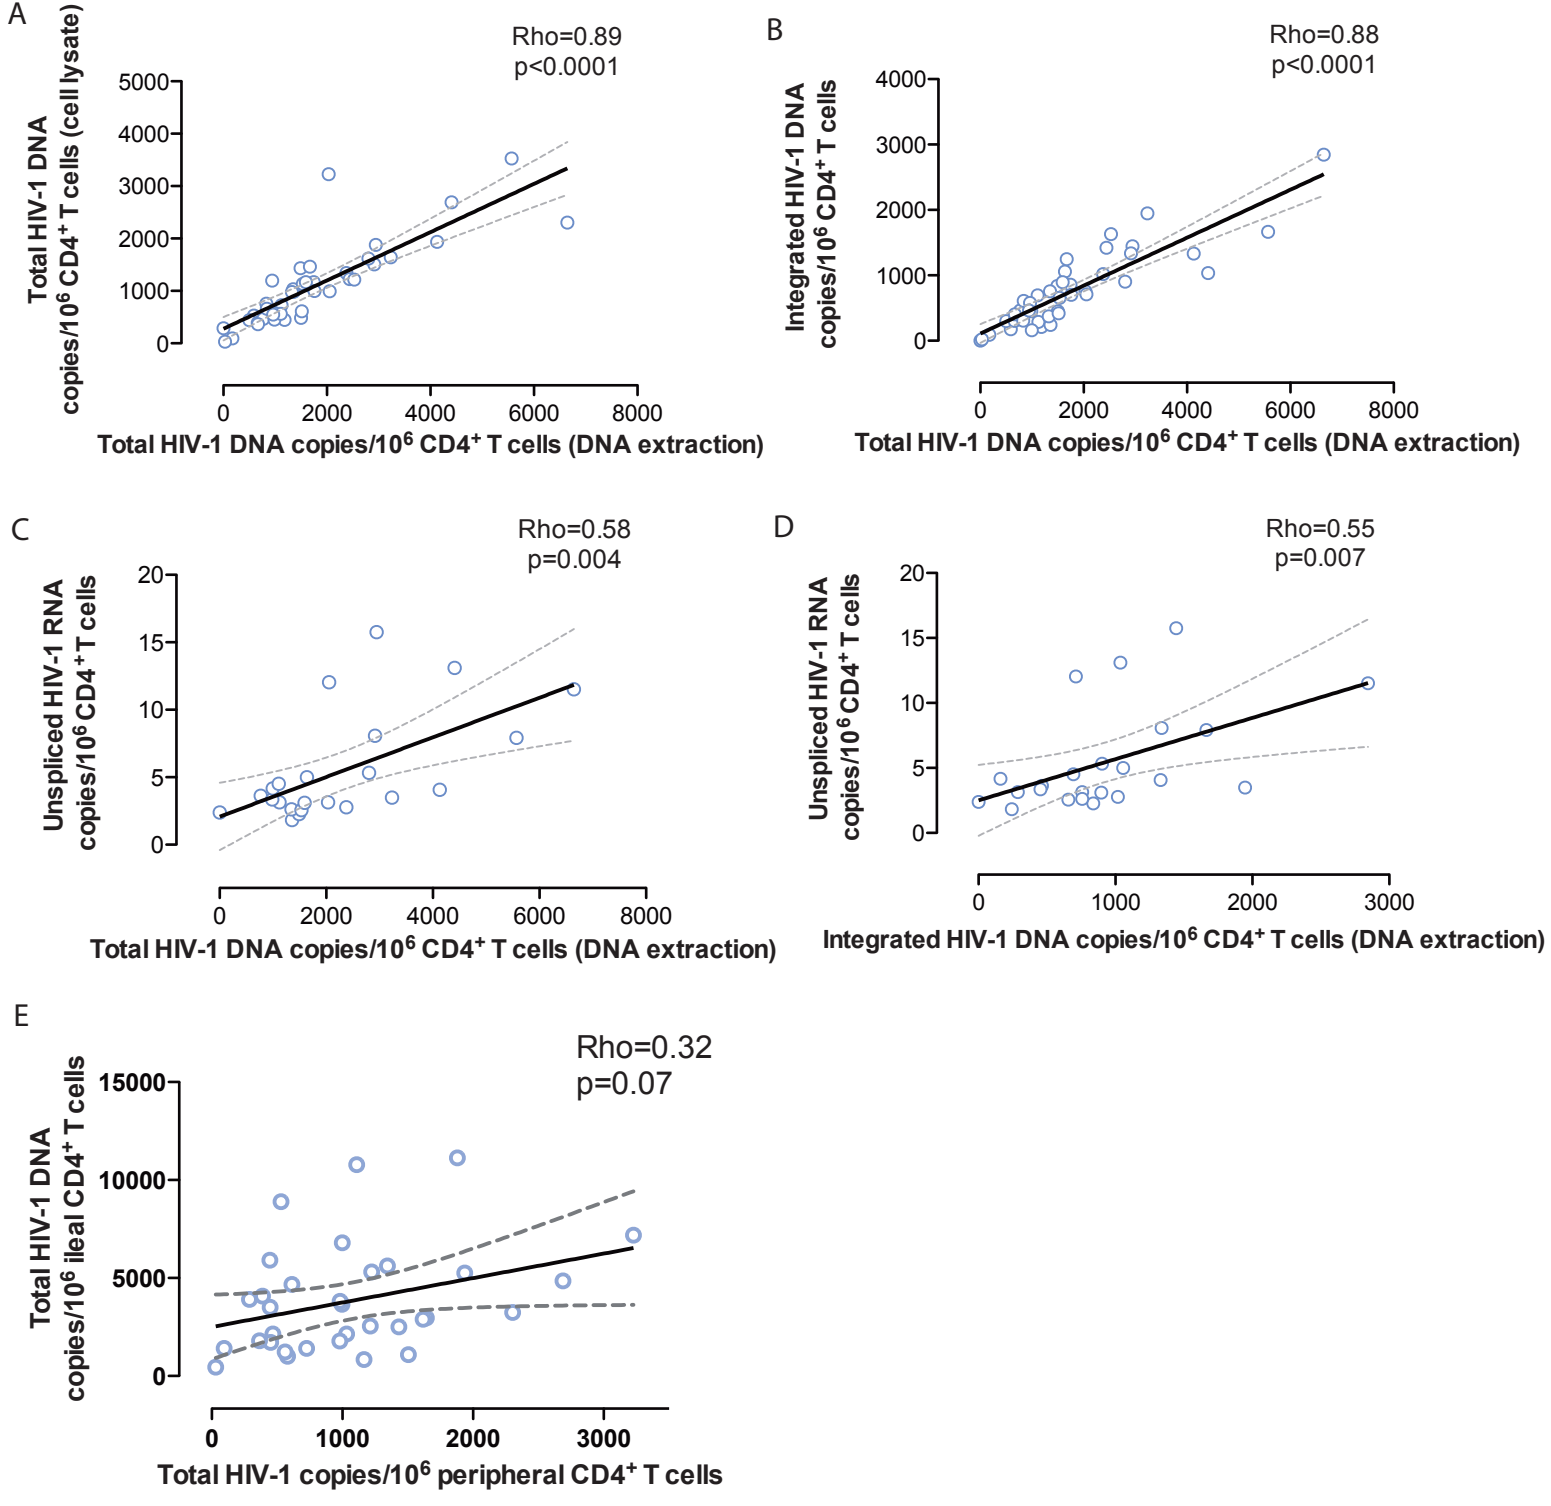

# Supplementary Figure 4

A

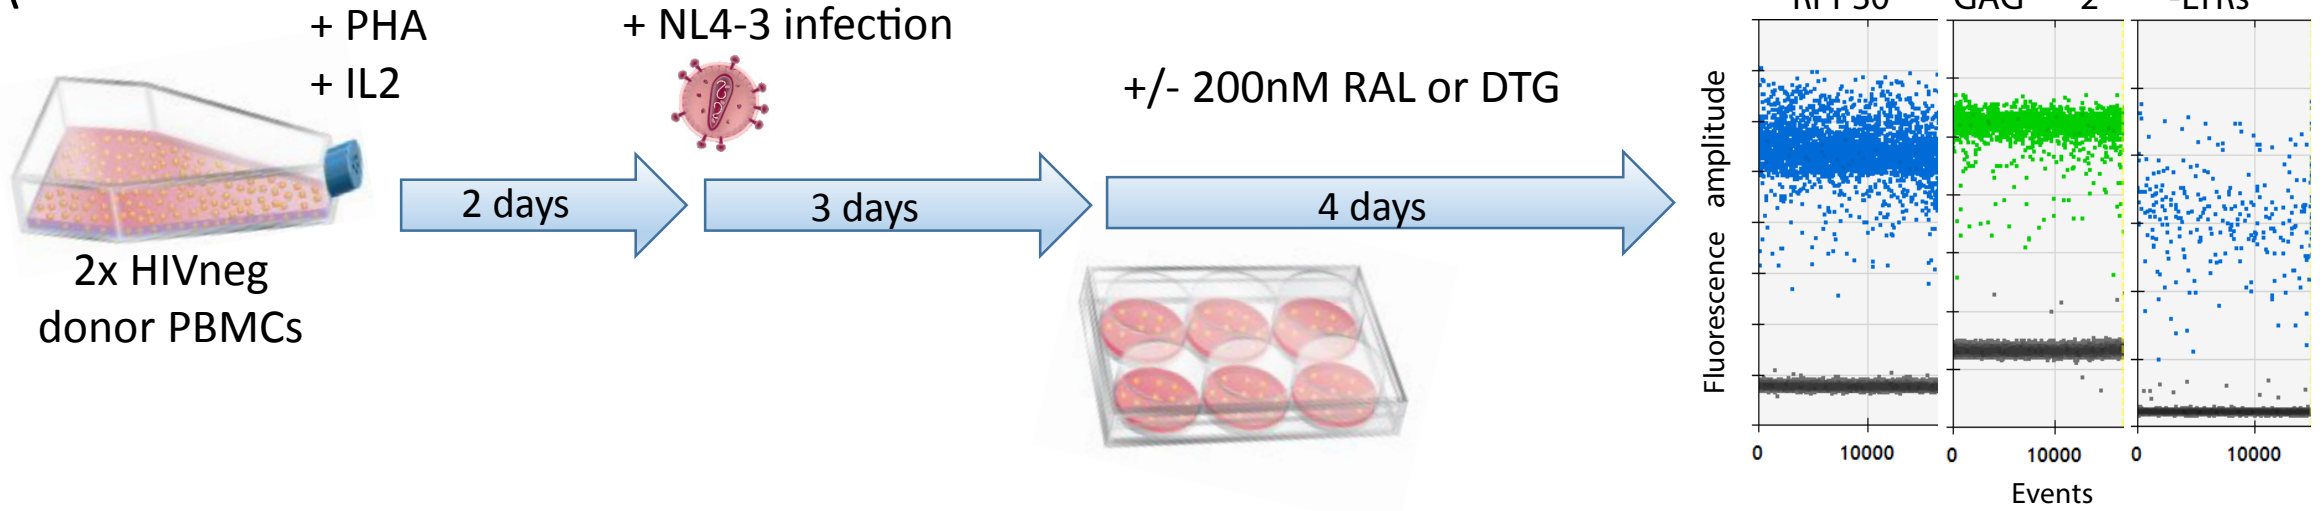

B

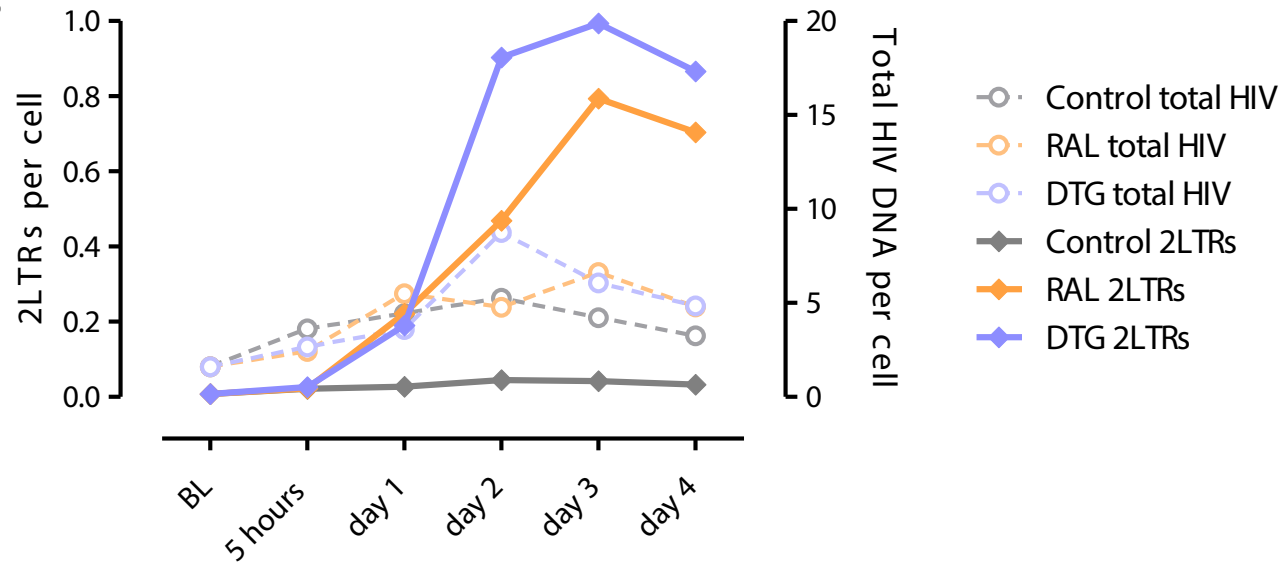

C

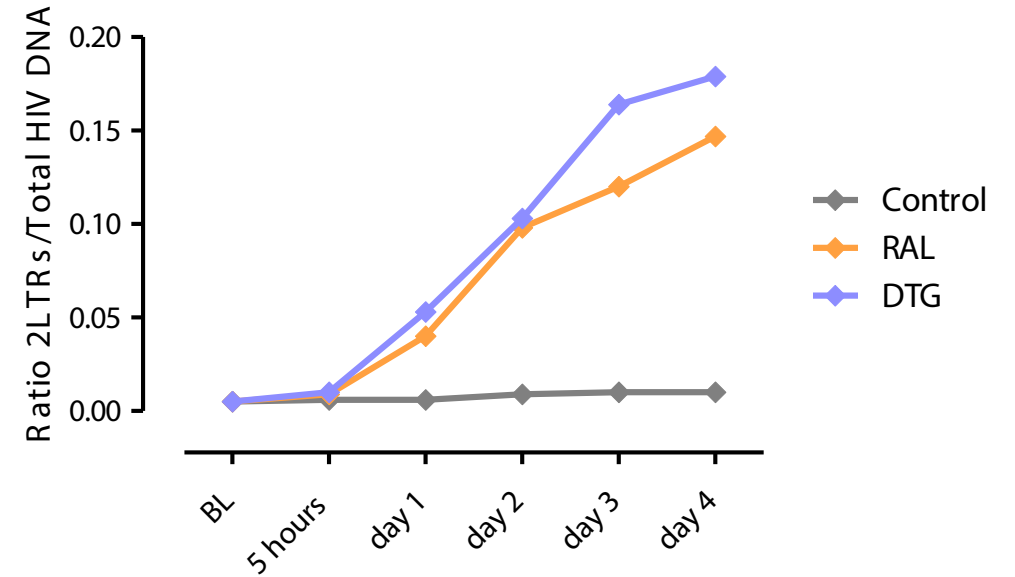

Supplement: ciy1095_suppl_supplementary_figures.pdf [file ciy1095_suppl_supplementary_figures.pdf]
